# Supplementary material
Source: PubMed Central journal article supplement (PMC3418057)
Supplement: NIHMS169369-supplement-1_si_001.pdf [file NIHMS169369-supplement-1_si_001.pdf]

## Supporting Information

### Multifrequency EPR Studies of Manganese Catalases Provide a Complete Description of Proteinaceous Nitrogen Coordination

*Troy A. Stich, James, W. Whittaker, and R. David Britt*

#### Contents

**Table S1.** Effective  $^{14}\text{N}$  hyperfine coupling constants found for exchange-coupled Fe dimers

**Table S2.** Measured HFI parameters of  $^{55}\text{Mn}$  atoms in exchange-coupled dimers

**Figure S1.** Effect of soft pulses on Mn(II) contaminated EPR spectra of MnCat

**Figure S2.** Simulation of tau-dependence of LP MnCat X-band three-pulse ESEEM

**Figure S3.** Simulation of field-dependence of LP MnCat X-band three-pulse ESEEM

**Figure S4.** Tau-dependence of LP MnCat  $K_a$ -band three-pulse ESEEM at two field positions

**Figure S5.** Simulation of tau-dependence of LP MnCat  $K_a$ -band three-pulse ESEEM

**Figure S6.** Simulation of tau-dependence of TT MnCat X-band three-pulse ESEEM

**Figure S7.** Tau-dependence of TT MnCat  $K_a$ -band three-pulse ESEEM at two field positions

**Figure S8.** Simulation of tau-dependence of TT MnCat  $K_a$ -band three-pulse ESEEM

**Figure S9.** Direct comparison of pulse EPR data of LP and TT MnCat

**Table S1.** Effective Isotropic HFI for  $^{14}\text{N}$  Atoms Coupled to Exchange Coupled Metal Clusters

| Species                                   | Coordination Geometry <sup>a</sup> | $A_{\text{iso}}$ (MHz) | Ref. |
|-------------------------------------------|------------------------------------|------------------------|------|
| Dinuclear Non-Heme Fe(II)Fe(III) Clusters |                                    |                        |      |
| methane monooxygenase hydroxylase         | eq. to $\text{O}_h$ Fe(III)        | 13.6                   | 1    |
|                                           | eq. to $\text{O}_h$ Fe(II)         | 5.0                    | 2    |
|                                           | eq. to $\text{O}_h$ Fe(III)        | 17.5                   | 3    |
|                                           | eq. to $\text{O}_h$ Fe(II)         | 5.2                    | 4    |
| uteroferrin                               |                                    | 12.6                   | 4    |
| semimethemerythrin                        | eq. to $\text{O}_h$ Fe(III)        | 9.3                    |      |
|                                           | eq. to $\text{O}_h$ Fe(III)        | $\approx 15$           | 5    |
|                                           | ax. to $\text{O}_h$ Fe(II)         | 5.1                    |      |
|                                           | eq. to $\text{O}_h$ Fe(II)         | 6.7                    |      |
| ribonucleotide reductase R2               |                                    | 7.31                   | 6    |
|                                           |                                    | 3.16                   |      |
| $\Delta^9$ -desaturase                    |                                    | 9.1                    | 6    |
|                                           |                                    | 3.34                   |      |
| MiaE                                      |                                    | 6.4                    | 7    |
|                                           |                                    | 4.1                    |      |
| Oxidized Rieske-type [2Fe2S] Clusters     |                                    |                        |      |
| sulredoxin                                |                                    | 4.6                    | 8    |
|                                           |                                    | 5.4                    |      |
| oxygenase-associated ferredoxin           |                                    | 4.4                    | 8    |
|                                           |                                    | 5.4                    |      |
| MitoNEET                                  |                                    | 6.25                   | 9    |

a. Simple description of the geometry of the metal-ligand interaction. For example, “eq. to  $\text{O}_h$  Fe(III)” refers to a  $^{14}\text{N}$  atom bound in the equatorial plane to a pseudo-octahedral Fe(III) ion.

**Table S2.** Measured HFI Parameters of <sup>55</sup>Mn Atoms in Exchange-Coupled Systems.

| Species                                                         | Mn(III)          |                |                | Mn(IV)           |                |                | Meth.    | Ref. |
|-----------------------------------------------------------------|------------------|----------------|----------------|------------------|----------------|----------------|----------|------|
|                                                                 | A <sub>iso</sub> | A <sub>⊥</sub> | A <sub>∥</sub> | A <sub>iso</sub> | A <sub>⊥</sub> | A <sub>∥</sub> |          |      |
| Ion in anatase                                                  | -247*2 = 494     |                |                | -215             |                |                |          |      |
| LP MnCat                                                        | 431              | 473            | 347            | 260              | 251            | 278            | <i>a</i> | 10   |
| LP MnCat + N <sub>3</sub> <sup>-</sup>                          | 417              | 457            | 337            | 257              | 249            | 273            | <i>a</i> | 10   |
| LP MnCat + CN <sup>-</sup>                                      | 414              | 457            | 327            | 249              | 242            | 263            | <i>a</i> | 10   |
| TT MnCat                                                        | 382              | 423            | 300            | 237              | 228            | 255            | <i>b</i> | 11   |
| TT MnCat                                                        | 387              | 424            | 312            | 235              | 228            | 250            | <i>e</i> | 12   |
| TT MnCat                                                        | 388              | 426            | 312            | 235              | 228            | 250            | <i>a</i> | 13   |
| bipy <sub>2</sub> Mn(III)O <sub>2</sub> Mn(IV)bipy <sub>2</sub> | 440              | 480            | 360            | 218              | 212            | 231            | <i>c</i> | 14   |
| TACN                                                            | 393              | 444            | 297            | 213              | 208            | 223            | <i>d</i> | 15   |

- a. X-band CW EPR
- b. X-, Q-, and W-band CW and pulse EPR
- c. X-band EPR and ENDOR
- d. X- and Q-band CW EPR and ENDOR
- e. S-, X-, and P-band CW EPR

**References.**

1. Hendrich, M. P.; Fox, B. G.; Andersson, K. K.; Debrunner, P. G.; Lipscomb, J. D., *J. Biol. Chem.* **1992**, *267* (1), 261-269.
2. Bender, C. J.; Rosenzweig, A. C.; Lippard, S. J.; Peisach, J., *J. Biol. Chem.* **1994**, *269* (23), 15993-15998.
3. DeRose, V. J.; Liu, K. E.; Lippard, S. J.; Hoffman, B. M., *J. Am. Chem. Soc.* **1996**, *118* (1), 121-134.
4. Doi, K.; McCracken, J.; Peisach, J.; Aisen, P., *J. Biol. Chem.* **1988**, *263* (12), 5757-5763.
5. Dikanov, S. A.; Davydov, R. M.; Graslund, A.; Bowman, M. K., *J. Am. Chem. Soc.* **1998**, *120* (27), 6797-6805.
6. Davydov, R.; Behrouzian, B.; Smoukov, S.; Stubbe, J.; Hoffman, B. M.; Shanklin, J., *Biochemistry* **2005**, *44* (4), 1309-1315.
7. Mathevon, C.; Pierrel, F.; Oddou, J. L.; Garcia-Serres, R.; Blonclin, G.; Latour, J. M.; Menage, S.; Gambarelli, S.; Fontecave, M.; Atta, M., *Proc. Natl. Acad. Sci. U. S. A.* **2007**, *104* (33), 13295-13300.
8. Dikanov, S. A.; Shubin, A. A.; Kounosu, A.; Iwasaki, T.; Samoilova, R. I., *J. Biol. Inorg. Chem.* **2004**, *9* (6), 753-767.
9. Dicus, M. M.; Stoll, S.; Conlan, A.; Nechustai, R.; Jennings, P. A.; Paddock, M. L.; Britt, R. D., *Biochemistry* **2009**, *submitted*.
10. Stemmler, T. L.; Sturgeon, B. E.; Randall, D. W.; Britt, R. D.; Penner-Hahn, J. E., *J. Am. Chem. Soc.* **1997**, *119* (39), 9215-9225.

11. Schäfer, K.-O.; Bittl, R.; Lenzian, F.; Barynin, V.; Weyhermüller, T.; Wieghardt, K.; Lubitz, W., *J. Phys. Chem. B* **2003**, *107* (5), 1242-1250.
12. Haddy, A.; Waldo, G. S.; Sands, R. H.; Penner-Hahn, J. E., *Inorg. Chem.* **1994**, *33* (12), 2677-82.
13. Ivancich, A.; Barynin, V. V.; Zimmermann, J.-L., *Biochemistry* **1995**, *34* (20), 6628-39.
14. Randall, D. W.; Sturgeon, B. E.; Ball, J. A.; Lorigan, G. A.; Chan, M. K.; Klein, M. P.; Armstrong, W. H.; Britt, R. D., *J. Am. Chem. Soc.* **1995**, *117* (47), 11780-9.
15. Zwegart, W.; Bittl, R.; Wieghardt, K.; Lubitz, W., *Chem. Phys. Lett.* **1996**, *261* (3), 272-276.

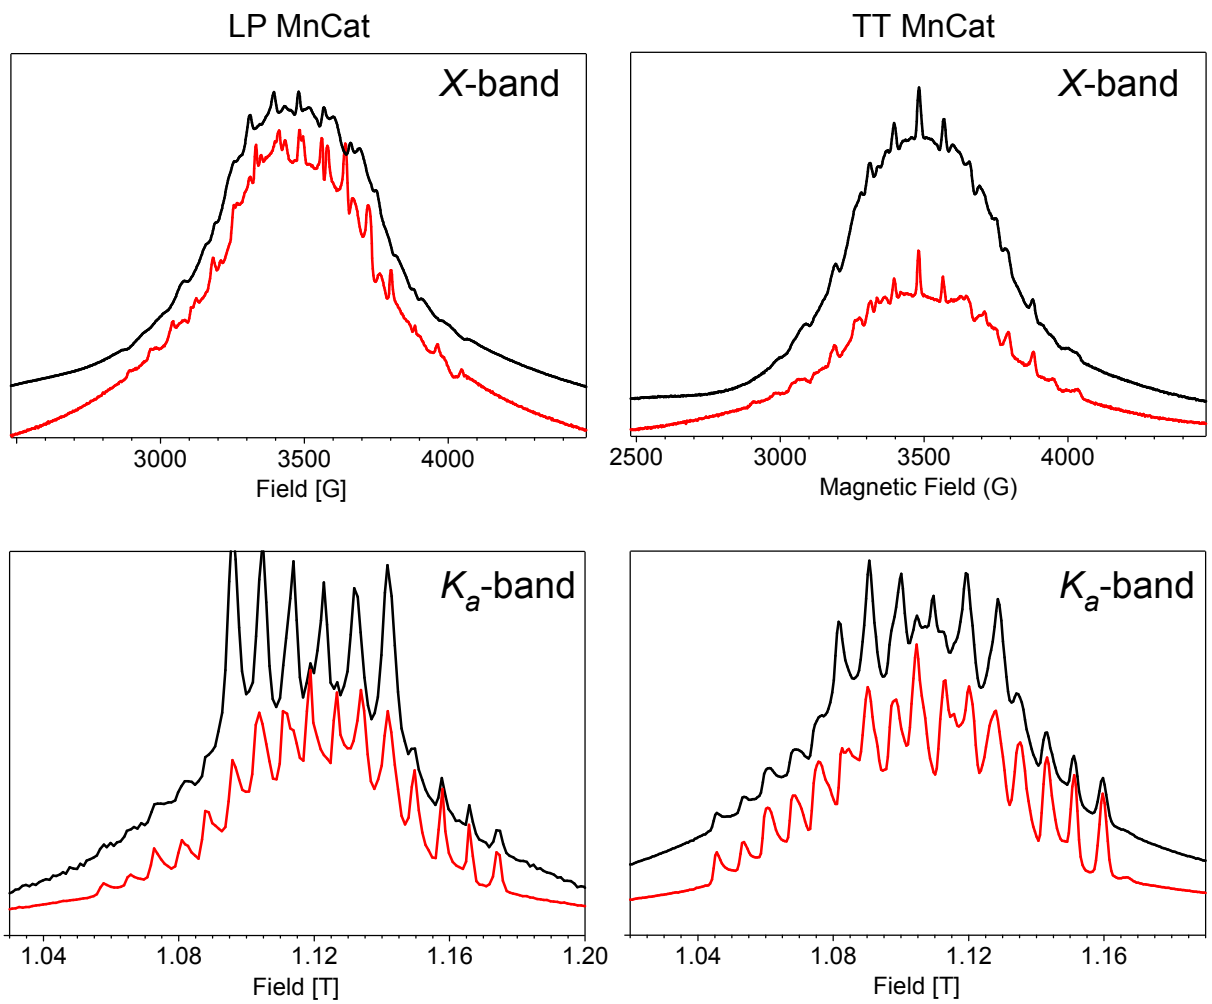

Stich et al. Supplemental Figure S1.

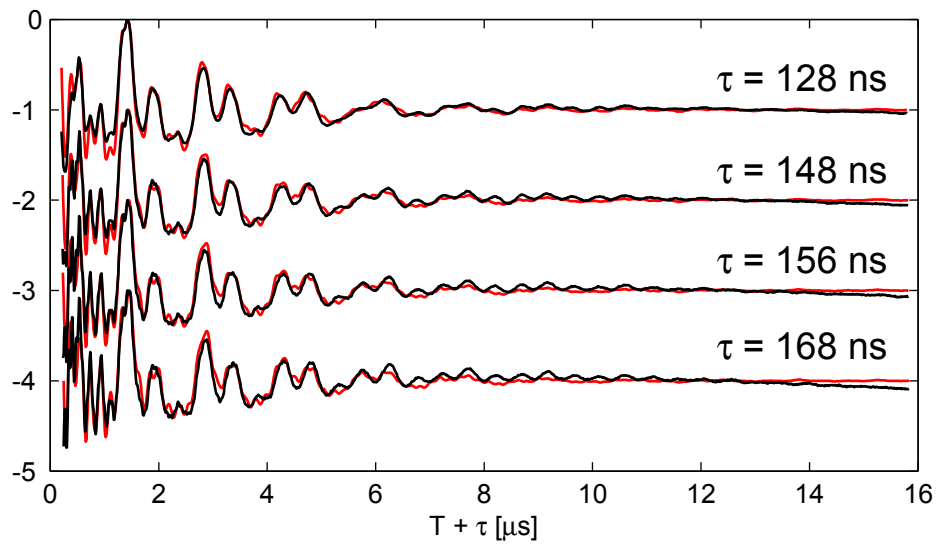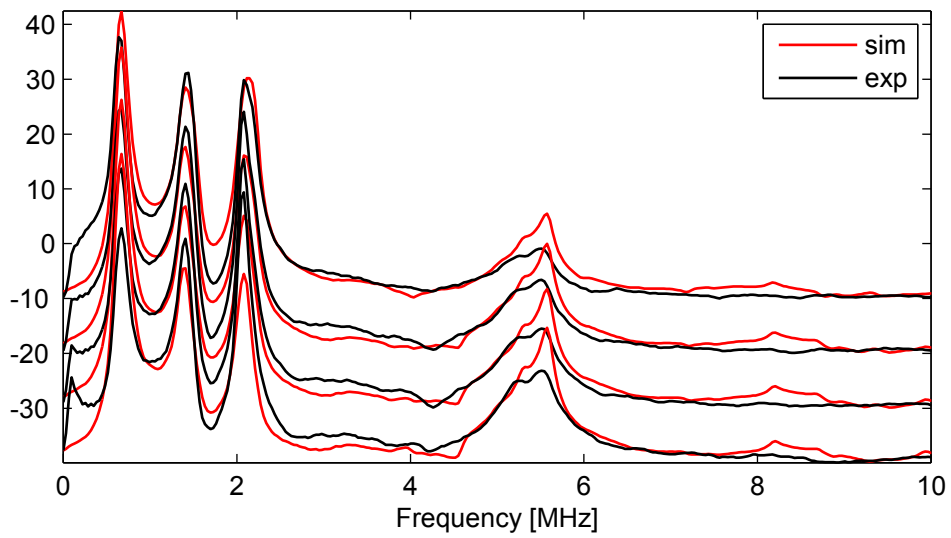

Stich et al. Supplemental Figure S2.

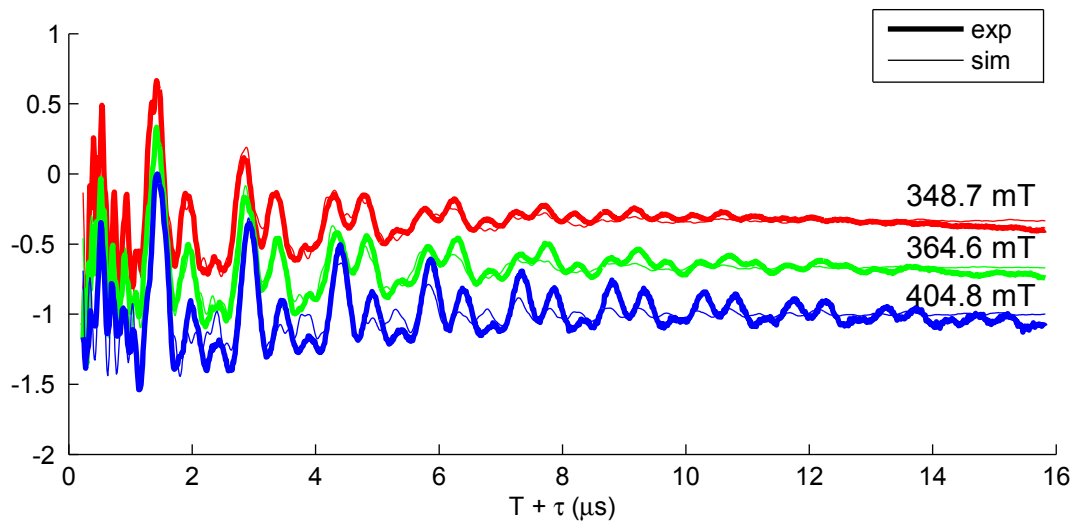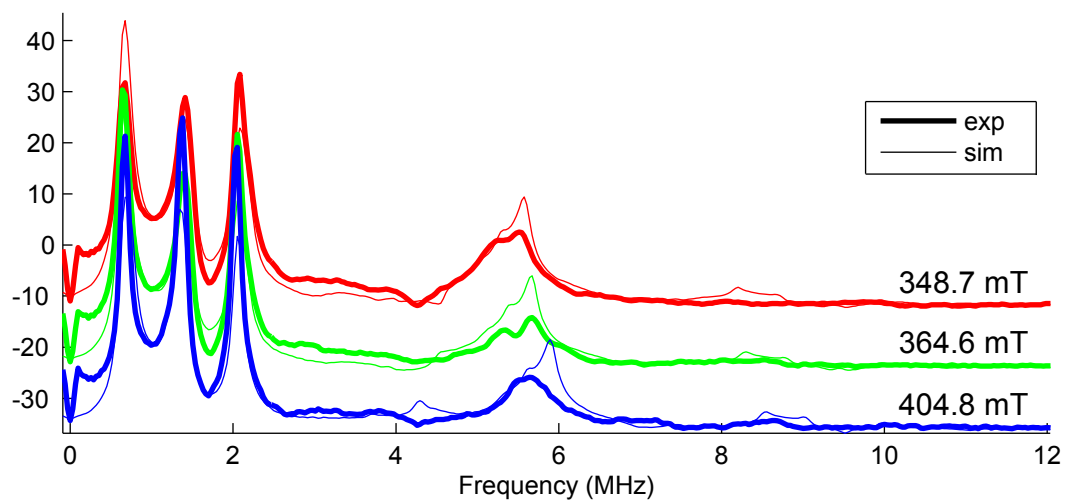

Stich et al. Supplemental Figure S3.

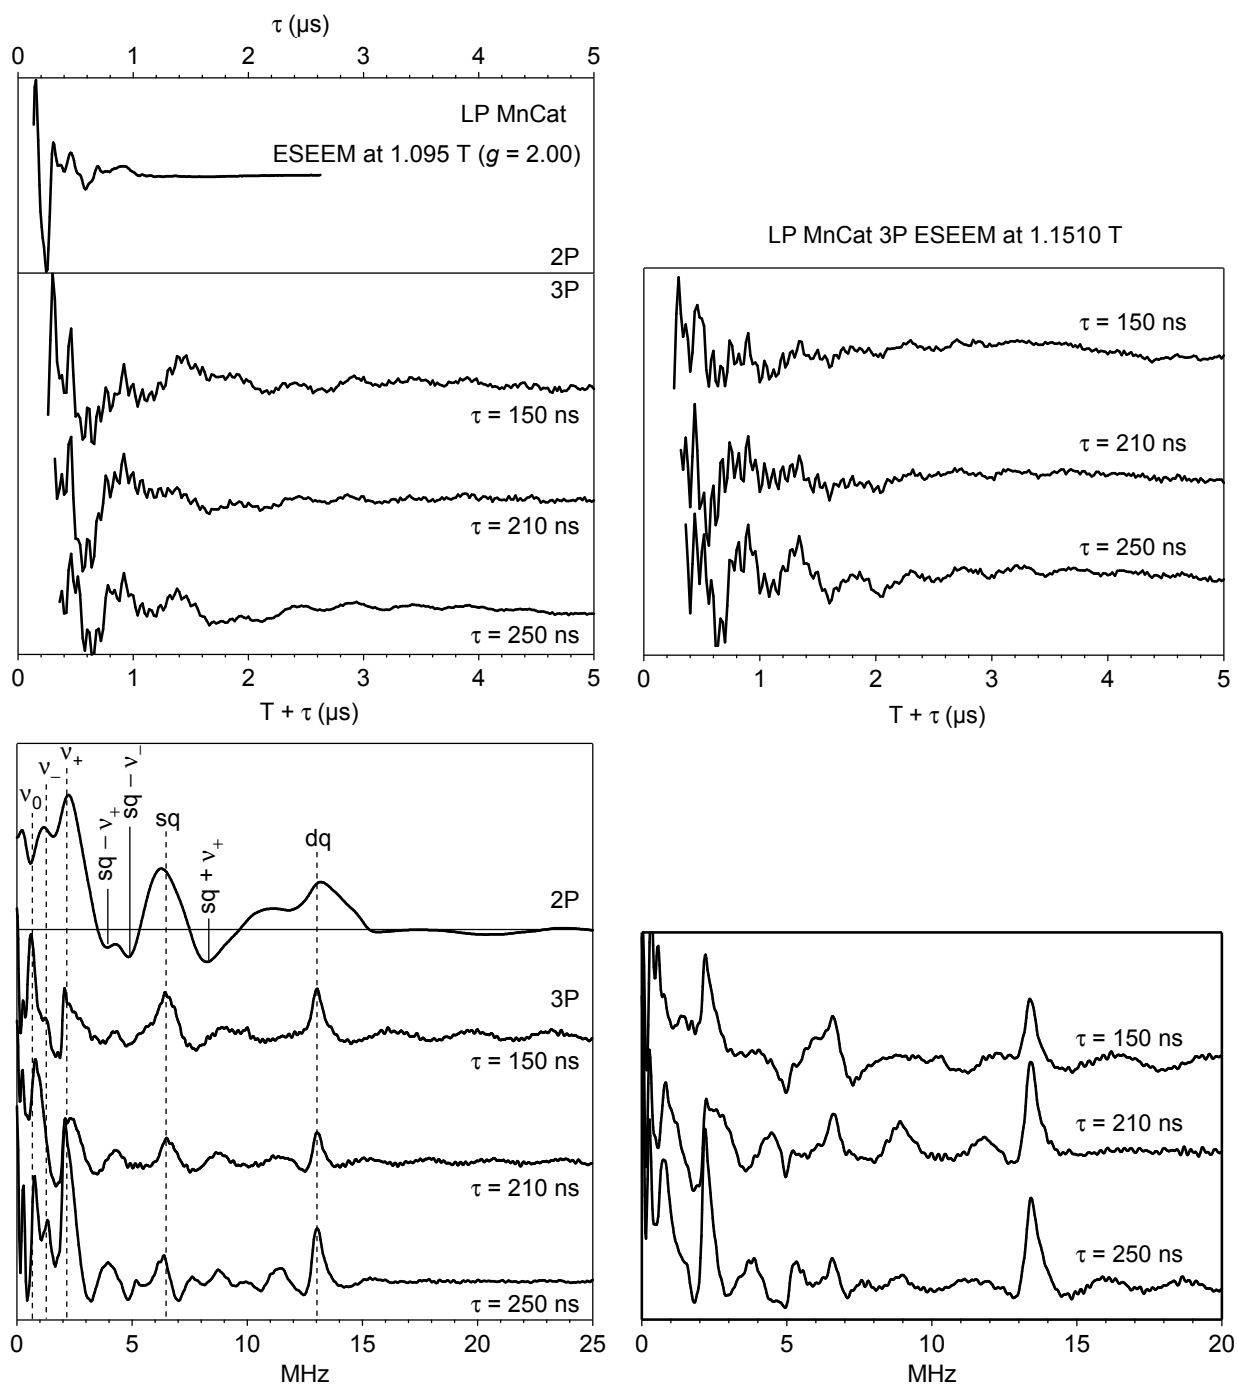

Stich et al. Supplemental Figure S4.



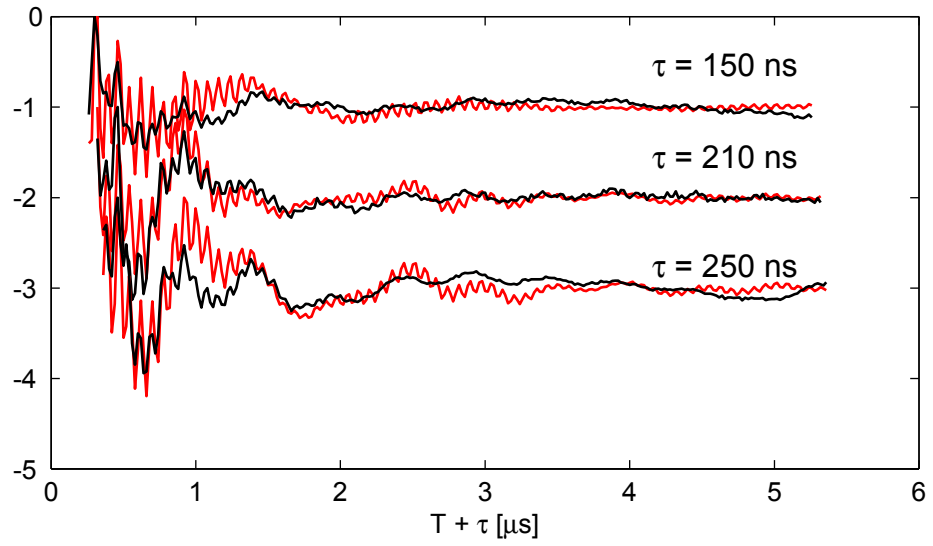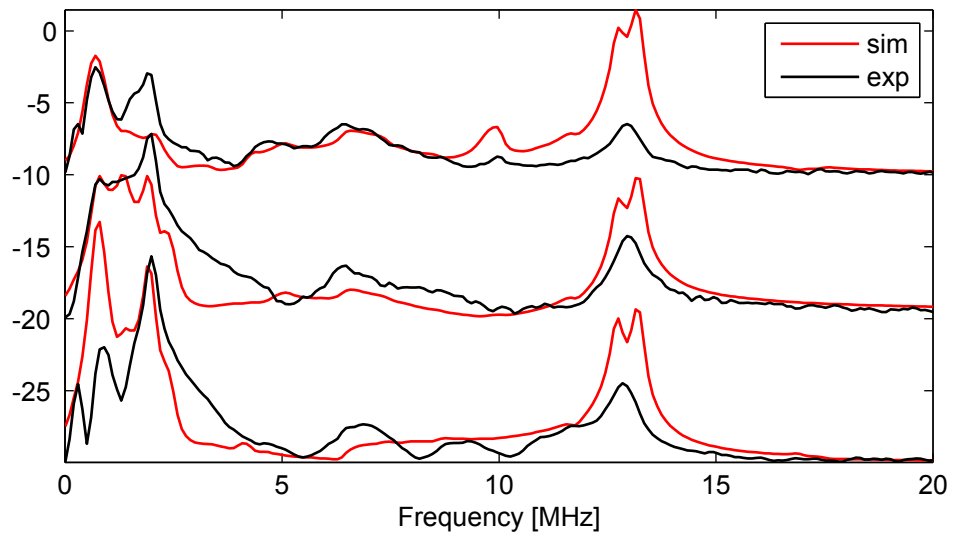

Stich et al. Supplemental Figure S5.

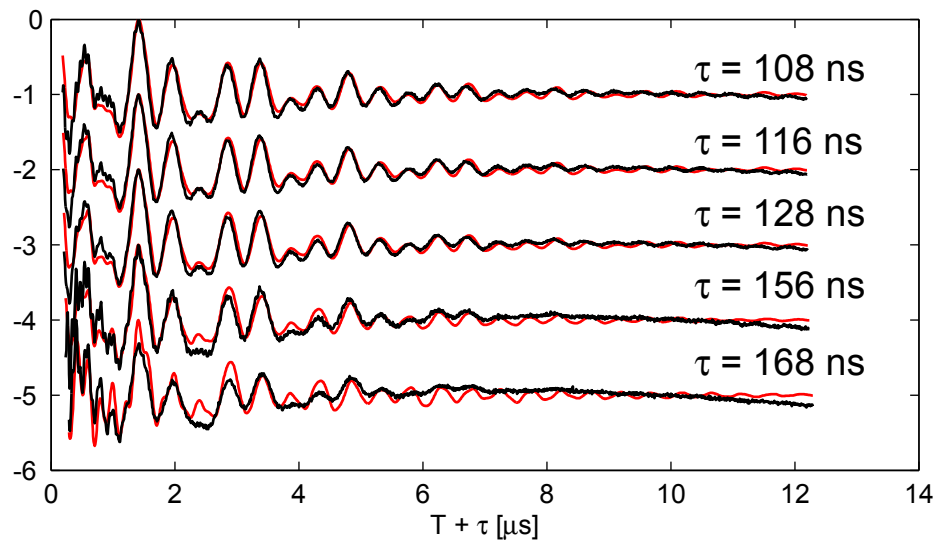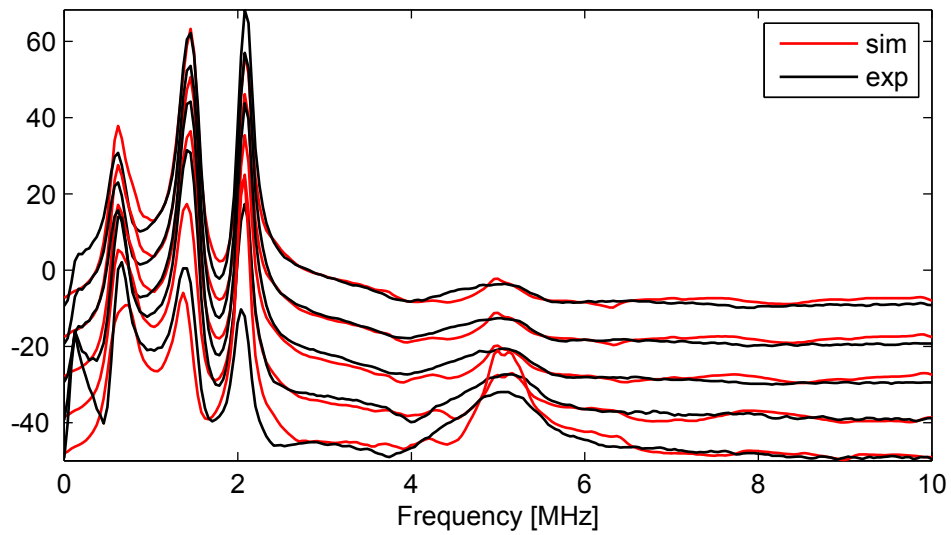

Stich et al. Supplemental Figure S6.

TT MnCat

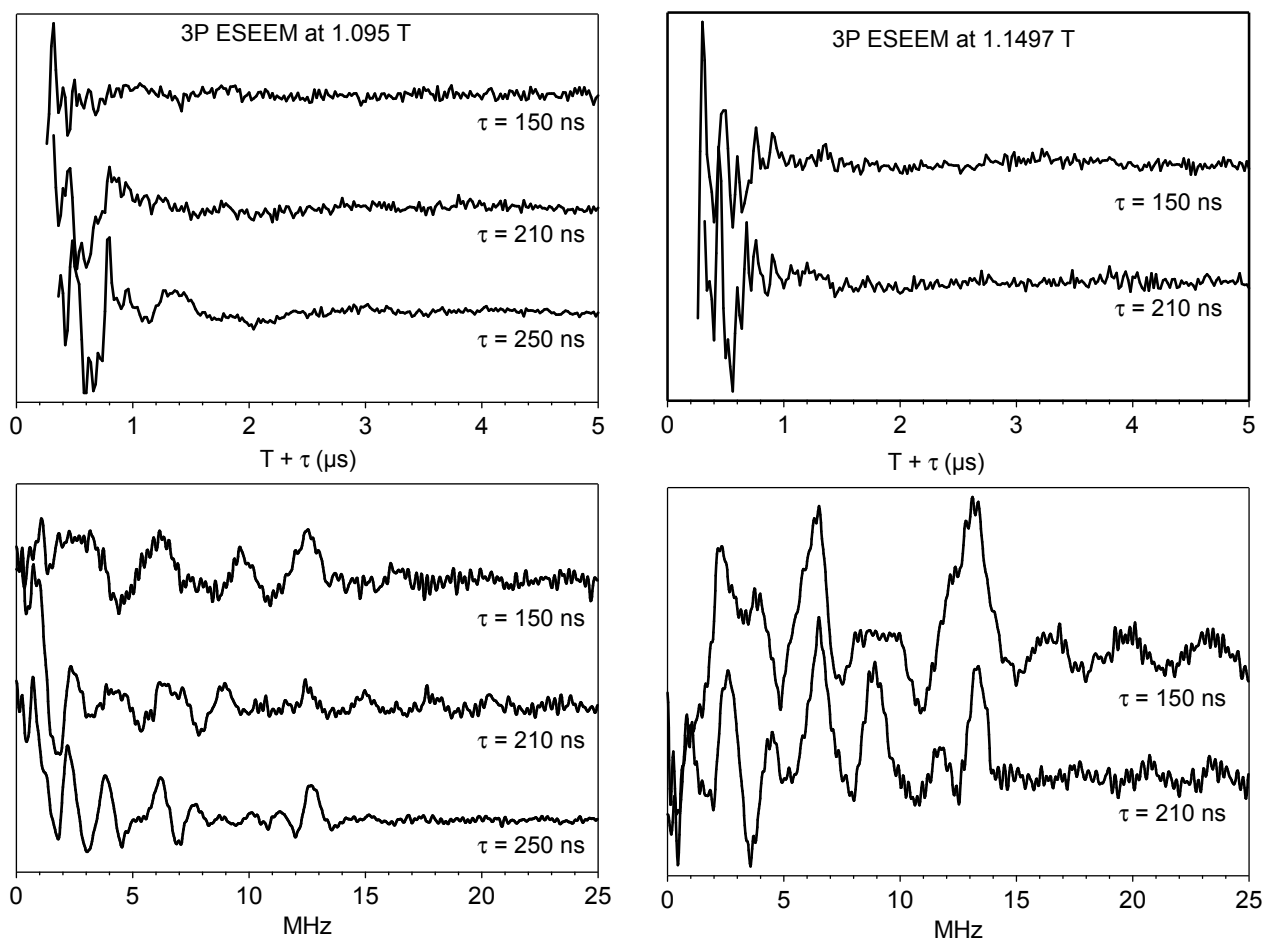

Stich et al. Supplemental Figure S7.

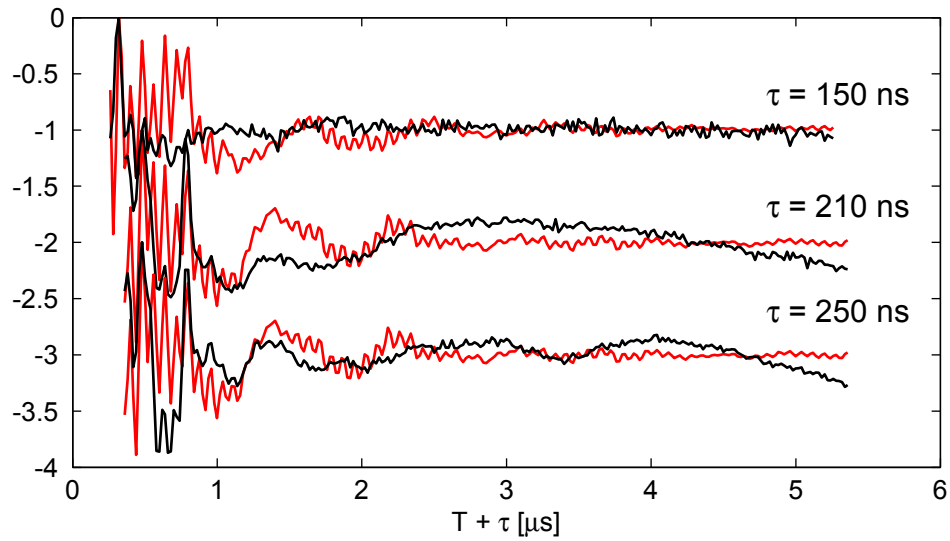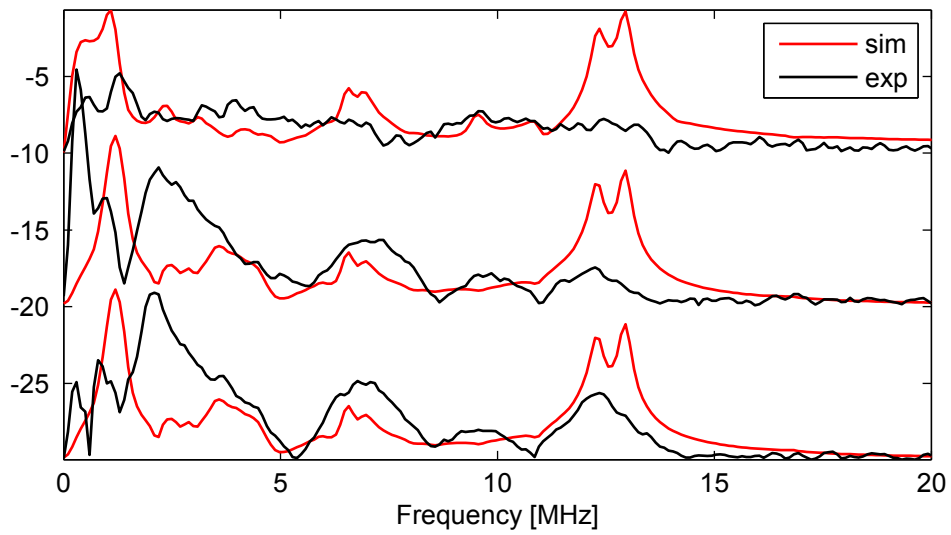

Stich et al. Supplemental Figure S8.

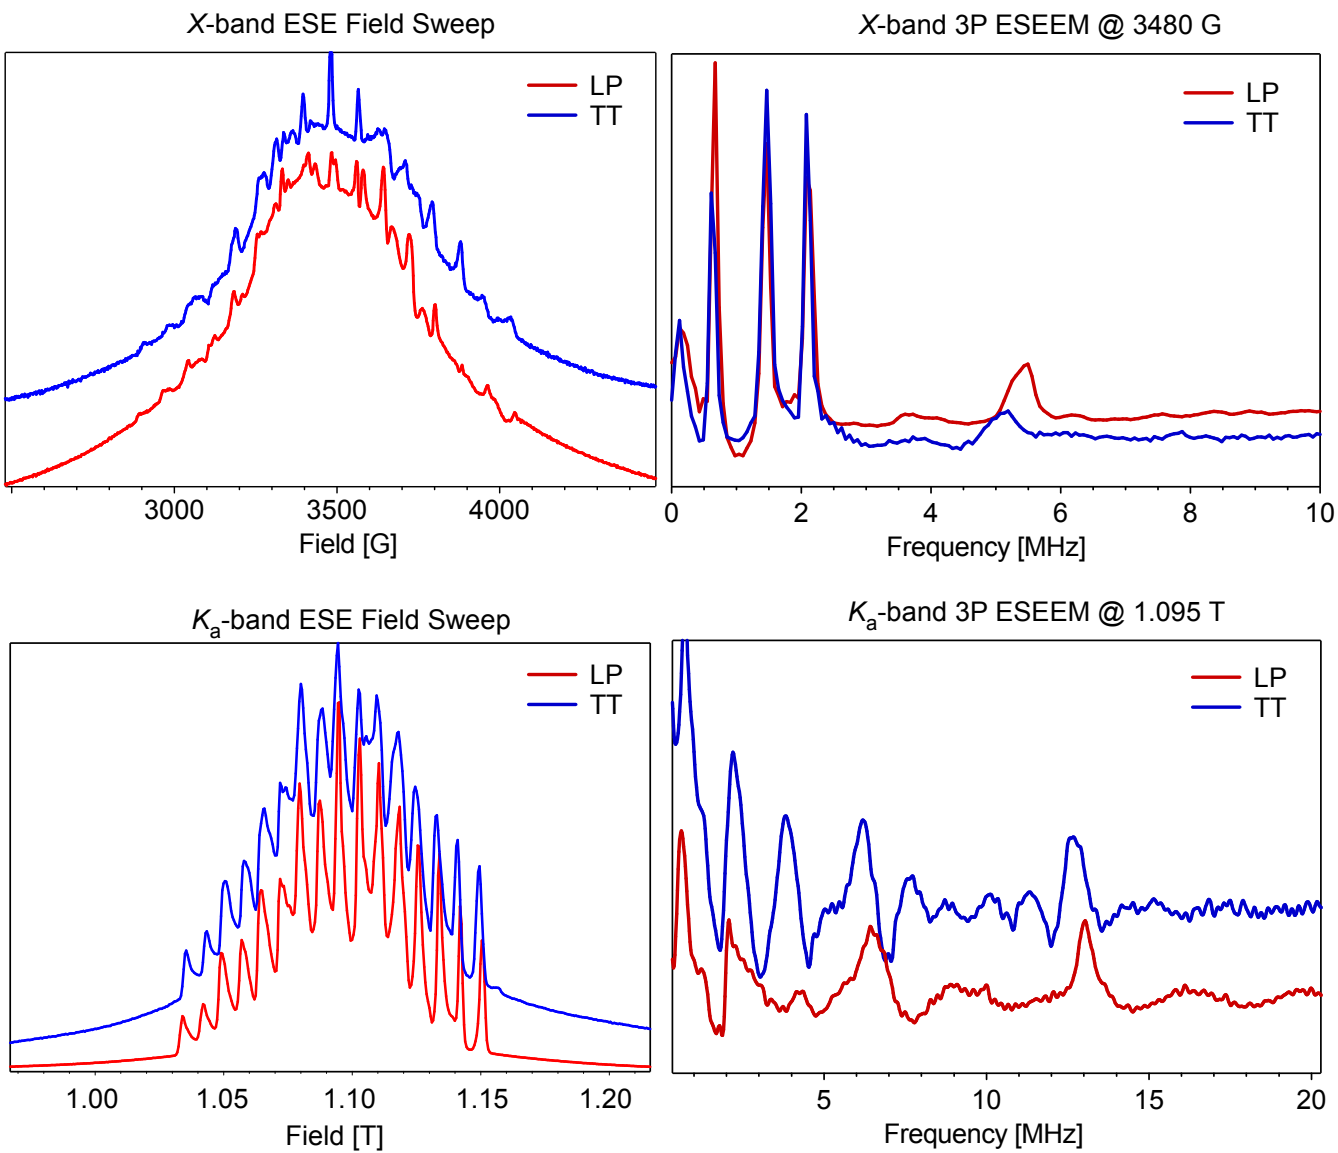

Stich et al. Supplemental Figure S9.
